# Supplementary material
Source: PubMed Central journal article supplement (PMC4025572)

**Figure S1**

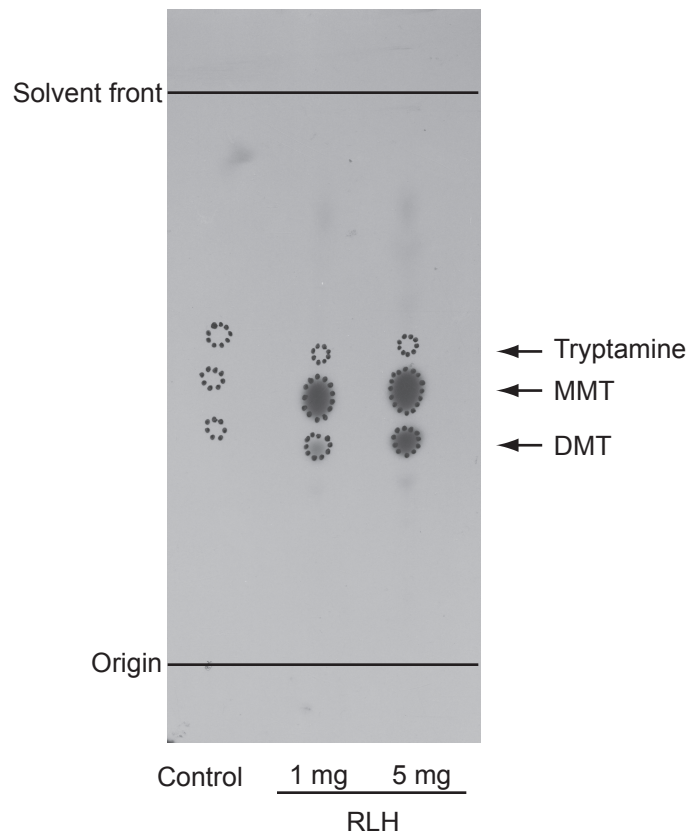



**Figure S3**

**A.**

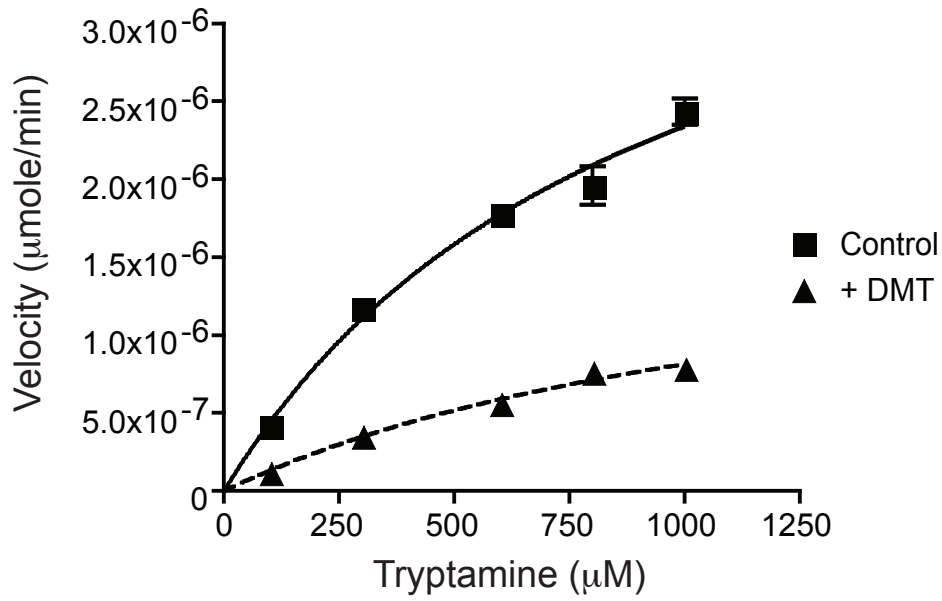

**B.**

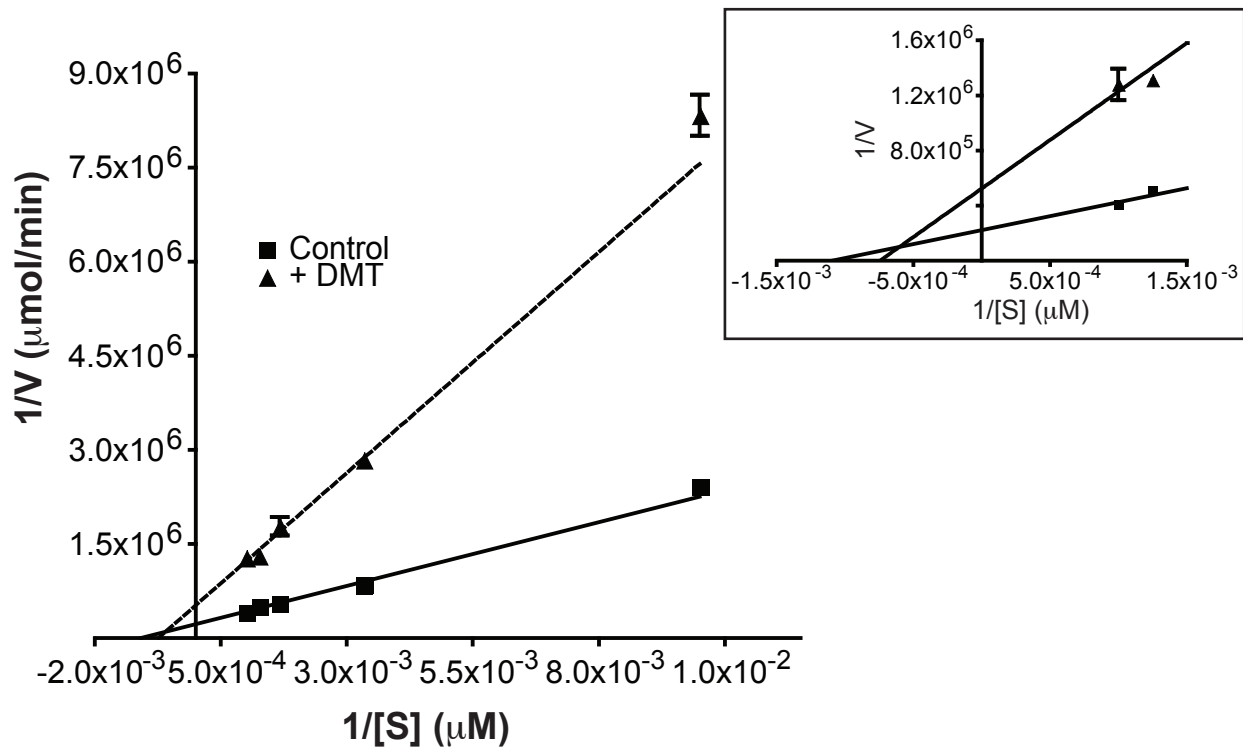

Figure S4

A.

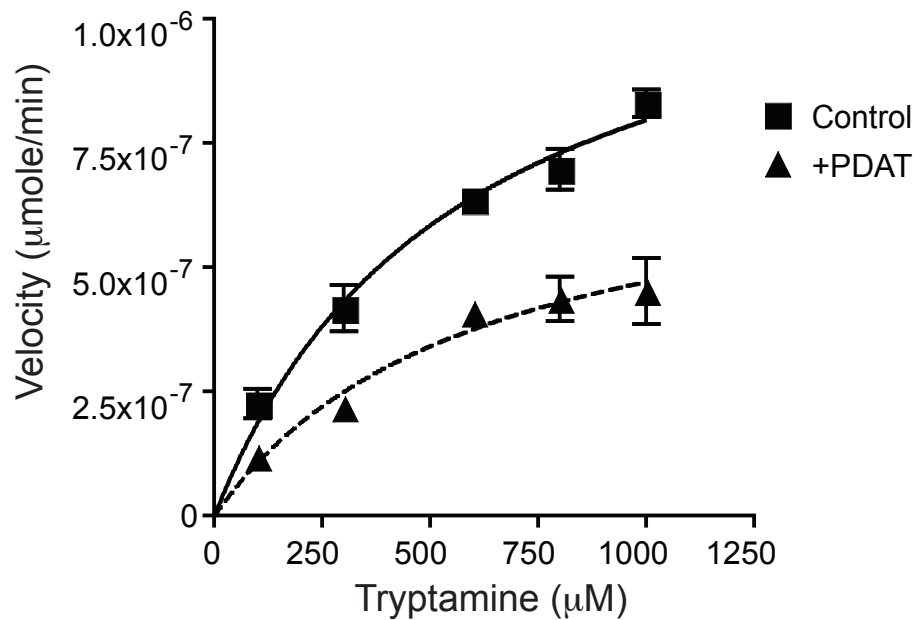

B.

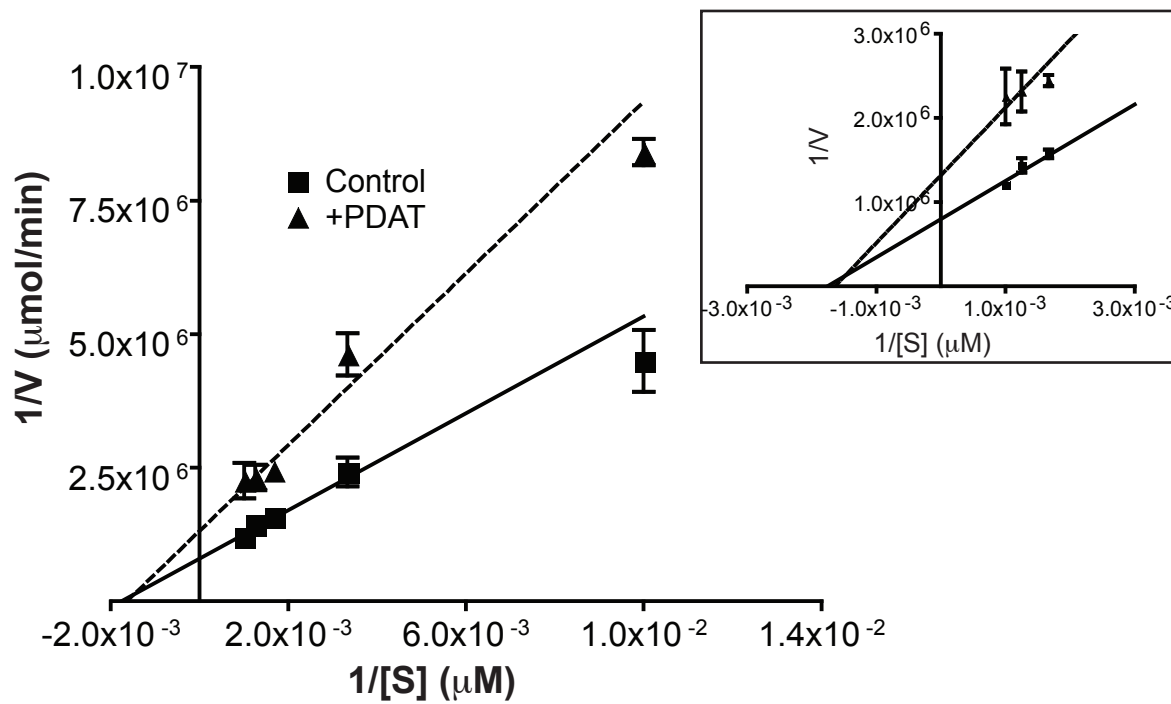

## Figure S5

### A. DMT (mixed competitive/non-competitive)

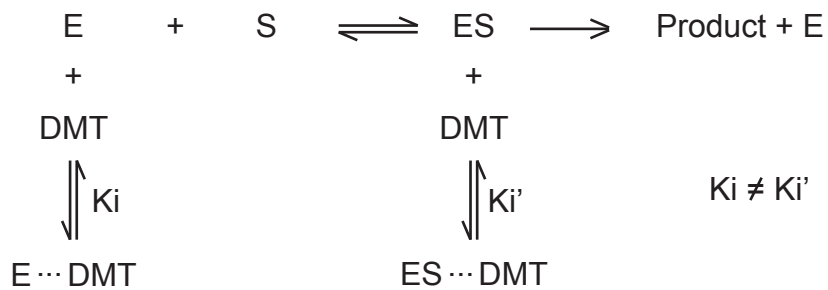

### B. PDAT (pure non-competitive)

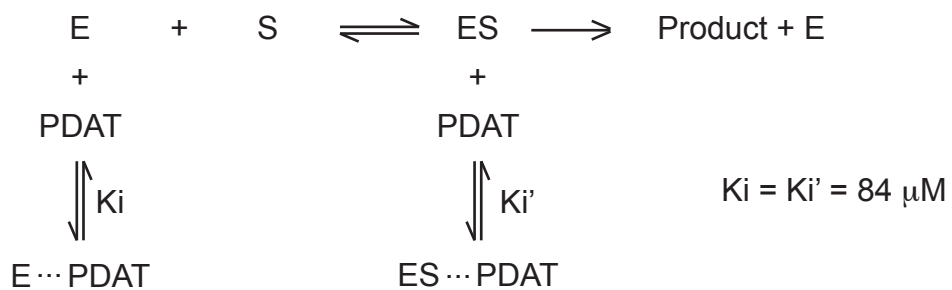

Supplement: bi500175p_si_002.pdf [file bi500175p_si_002.pdf]
